# Supplementary material for: Mixed anion control of enhanced negative thermal expansion in the oxysulfide of PbTiO3
Source: Royal Society of Chemistry journal article supplement (doi:10.1039/d4mh00795f), 2024-01-01
Supplement: d4mh00795f1.pdf [file d4mh00795f1.pdf]

## Electronic Supplementary Information

### Mixed anion control of enhanced negative thermal expansion in the oxysulfide of **PbTiO<sub>3</sub>**

Zhao Pan<sup>1,2,\*</sup>, Zhengli Liang<sup>3</sup>, Xiao Wang<sup>1</sup>, Yue-Wen Fang<sup>4,5,\*</sup>, Xubin Ye<sup>1</sup>, Zhehong Liu<sup>1</sup>, Takumi Nishikubo<sup>6,2</sup>, Yuki Sakai<sup>6,2</sup>, Xi Shen<sup>1</sup>, Qiumin Liu<sup>2</sup>, Shogo Kawaguchi<sup>7</sup>, Fei Zhan<sup>8</sup>, Longlong Fan<sup>8</sup>, Yong-Yang Wang<sup>8</sup>, Chen-Yan Ma<sup>8</sup>, Xingxing Jiang<sup>3</sup>, Zheshuai Lin<sup>3</sup>, Richeng Yu<sup>1</sup>, Xianran Xing<sup>9,\*</sup>, Masaki Azuma<sup>2,6</sup> & Youwen Long<sup>1,10,\*</sup>

<sup>1</sup>*Beijing National Laboratory for Condensed Matter Physics, Institute of Physics, Chinese Academy of Sciences, Beijing 100190, China*

<sup>2</sup>*Laboratory for Materials and Structures, Tokyo Institute of Technology, 4259 Nagatsuta, Midori, Yokohama, 226-8503, Japan*

<sup>3</sup>*Center for Crystal R&D, Key Laboratory of Functional Crystals and Laser Technology, Technical Institute of Physics and Chemistry, Chinese Academy of Sciences, Beijing 100190, China*

<sup>4</sup>*Fisika Aplikatua Saila, Gipuzkoako Ingeniaritza Eskola, University of the Basque Country (UPV/EHU), Europa Plaza 1, 20018 Donostia/San Sebastian, Spain*

<sup>5</sup>*Centro de Física de Materiales (CSIC-UPV/EHU), Manuel de Lardizabal Pasealekua 5, 20018 Donostia/San Sebastian, Spain*

<sup>6</sup>*Kanagawa Institute of Industrial Science and Technology (KISTEC), 705-1 Shimoimaizumi, Ebina, Kanagawa 243-0435, Japan*

<sup>7</sup>*Research and Utilization Division, Japan Synchrotron Radiation Research Institute (JASRI), SPring-8, 1-1-1 Kouto, Sayo-cho, Sayo-gun, Hyōgo 679-5198, Japan*

<sup>8</sup>*Synchrotron Radiation Laboratory, Institute of High Energy Physics, Chinese Academy of Sciences, Beijing 100049, China*

<sup>9</sup>*Beijing Advanced Innovation Center for Materials Genome Engineering and Department of Physical Chemistry, University of Science and Technology Beijing, Beijing 100083, China*

<sup>10</sup>*Songshan Lake Materials Laboratory, Dongguan, Guangdong 523808, China*

Corresponding author: [zhaopan@iphy.ac.cn](mailto:zhaopan@iphy.ac.cn); [yuewen.fang@ehu.es](mailto:yuewen.fang@ehu.es); [xing@ustb.edu.cn](mailto:xing@ustb.edu.cn); [ywlong@iphy.ac.cn](mailto:ywlong@iphy.ac.cn)

## Supplementary Figures and Tables

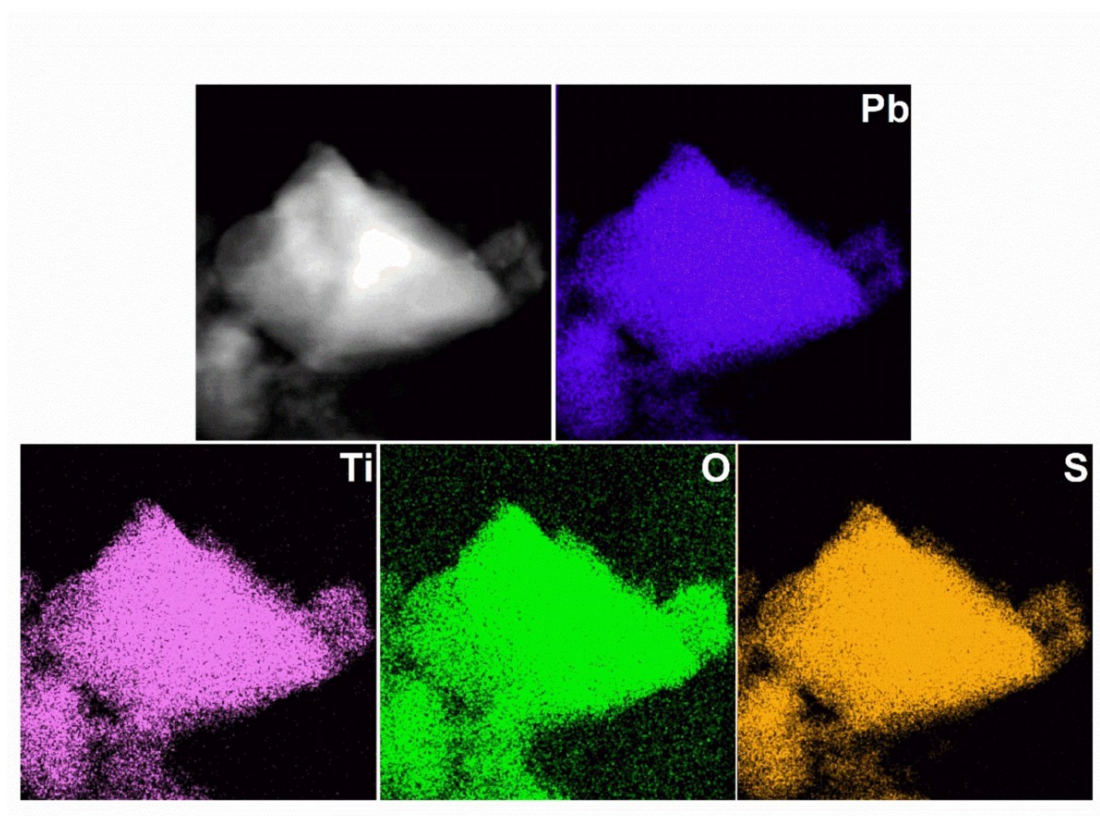

**Fig. S1** Microstructural analysis. The elemental distribution of the PTOS1 sample.

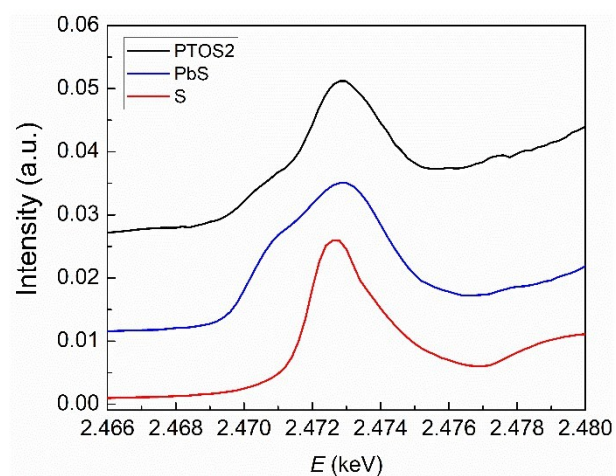

**Fig. S2** XANES analysis. XANES spectra at the S-K edges of the PTOS2 compound. The XANES of PbS and S are shown for comparison.

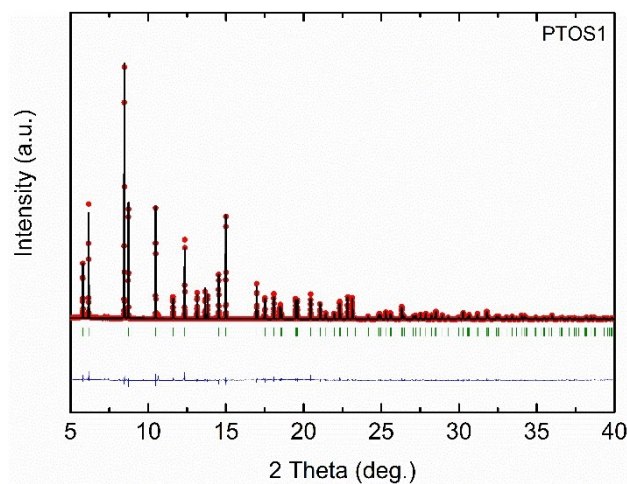

**Fig. S3** Synchrotron X-ray diffraction refinement. Rietveld refinement of the SXRD pattern of tetragonal PTOS1 at room temperature. Observed (red, solid circles), calculated (black line), and their difference profiles (bottom line) are shown. The Bragg reflection positions are indicated by the green ticks ( $\lambda = 0.42 \text{ \AA}$ ).

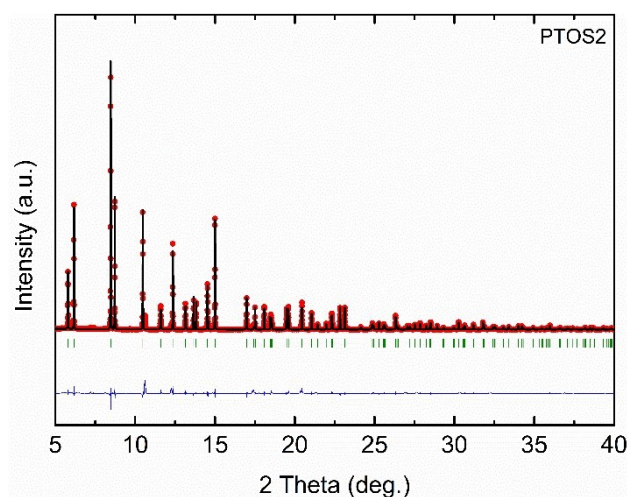

**Fig. S4** Synchrotron X-ray diffraction refinement. Rietveld refinement of the SXRD pattern of tetragonal PTOS2 at room temperature. Observed (red, solid circles), calculated (black line), and their difference profiles (bottom line) are shown. The Bragg reflection positions are indicated by the green ticks ( $\lambda = 0.42 \text{ \AA}$ ).

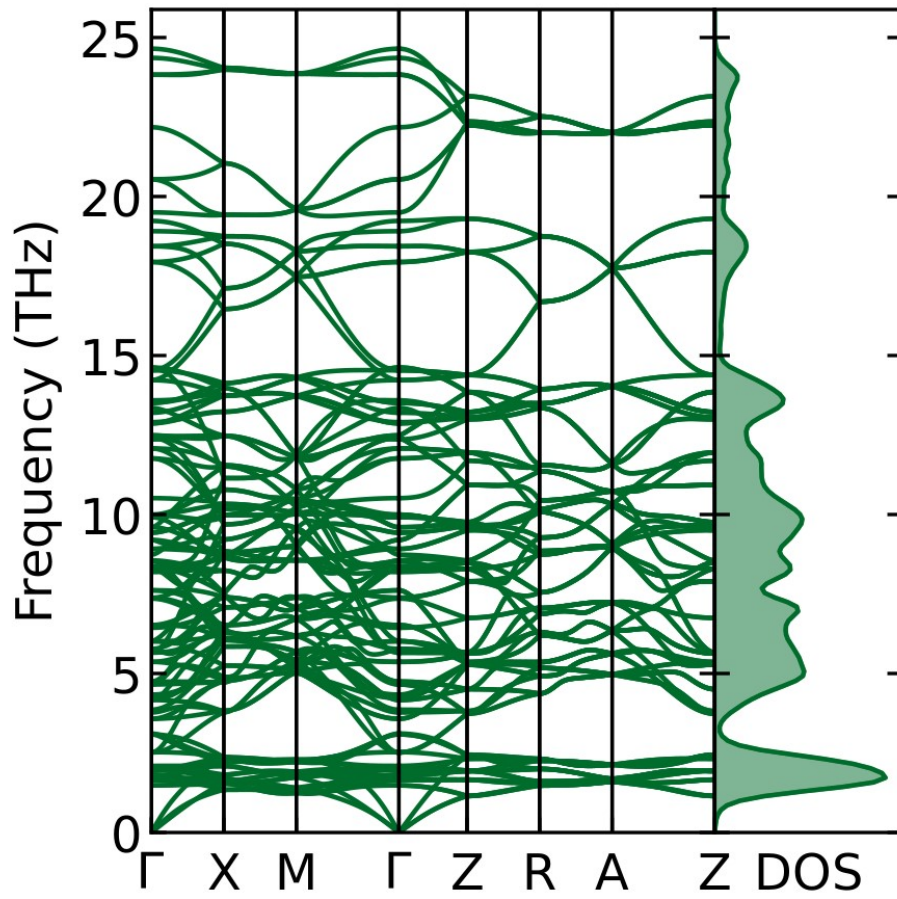

**Fig. S5** The phonon dispersions and phonon density of states of the 40-atom PT supercell, indicating the dynamical stability.

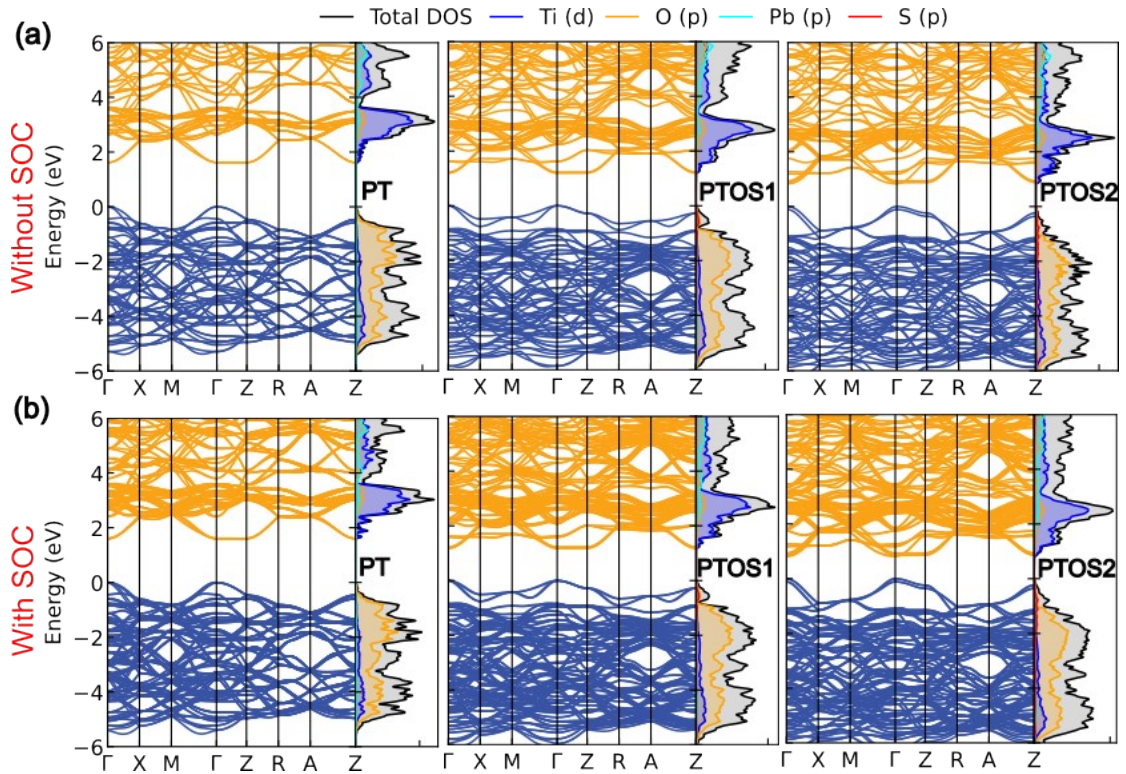

**Fig. S6** Band structure and density of states. (a) Electronic structure of PT, PTOS1 and PTOS2 without spin-orbit coupling (SOC). (b) Electronic structure of PT, PTOS1 and PTOS2 with SOC. The Fermi energy is set to zero. The legend is applicable to the density of states only.

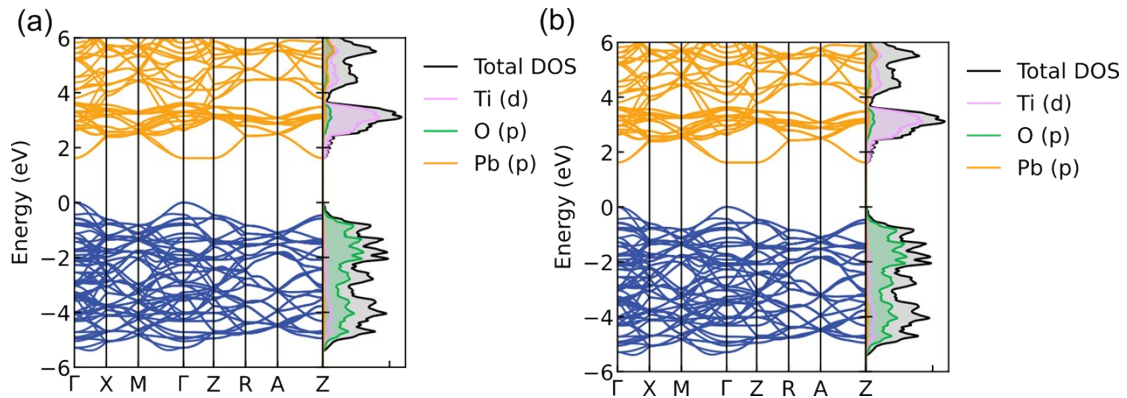

**Fig. S7** Comparison between GGA and LDA results. (a) GGA calculated band structure and density of states. (b) LDA calculated band structure and density of states. The Fermi energy is set to zero. The legend is applicable to the density of states only.

**Table S1** The refined structural parameters for the PTOS1 and PTOS2 compounds at room temperature.

| Composition         | Space group | Atom | Site | g     | x     | y     | z         | 100U <sub>iso</sub> (Å <sup>2</sup> ) |
|---------------------|-------------|------|------|-------|-------|-------|-----------|---------------------------------------|
| PTOS1 <sup>a)</sup> | <i>P4mm</i> | Pb   | 1a   | 1.000 | 0.000 | 0.000 | 0.000     | 0.900                                 |
|                     |             | Ti   | 1b   | 1.000 | 0.500 | 0.500 | 0.539(5)  | 0.600                                 |
|                     |             | O1   | 1b   | 0.997 | 0.500 | 0.500 | 0.098(10) | 1.000                                 |
|                     |             | S1   | 1b   | 0.003 | 0.500 | 0.500 | 0.098(10) | 1.000                                 |
|                     |             | O2   | 2c   | 0.997 | 0.500 | 0.000 | 0.624(9)  | 1.000                                 |
|                     |             | S2   | 2c   | 0.003 | 0.500 | 0.000 | 0.624(9)  | 1.000                                 |
| PTOS2 <sup>b)</sup> | <i>P4mm</i> | Pb   | 1a   | 1.000 | 0.000 | 0.000 | 0.000     | 0.900                                 |
|                     |             | Ti   | 1b   | 1.000 | 0.500 | 0.500 | 0.538(9)  | 0.700                                 |
|                     |             | O1   | 1b   | 0.993 | 0.500 | 0.500 | 0.085(10) | 1.000                                 |
|                     |             | S1   | 1b   | 0.007 | 0.500 | 0.500 | 0.085(10) | 1.000                                 |
|                     |             | O2   | 2c   | 0.993 | 0.500 | 0.000 | 0.622(8)  | 1.000                                 |
|                     |             | S2   | 2c   | 0.007 | 0.500 | 0.000 | 0.622(8)  | 1.000                                 |

<sup>a)</sup>Space group *P4mm*,  $Z=1$ ,  $a = b = 3.9011(7)$  Å,  $c = 4.1553(2)$  Å,  $V = 63.2403(5)$  Å<sup>3</sup>,  $R$ -factor (%):

$R_{wp} = 7.94$ ,  $R_p = 6.51$ ;

<sup>b)</sup>Space group *P4mm*,  $Z=1$ ,  $a = b = 3.9012(1)$  Å,  $c = 4.1554(6)$  Å,  $V = 63.2437(7)$  Å<sup>3</sup>,  $R$ -factor (%):

$R_{wp} = 9.25$ ,  $R_p = 7.90$ .
